# Supplementary material for: Regulation and Release of Vasoactive Endoglin by Brain Endothelium in Response to Hypoxia/Reoxygenation in Stroke
Source: MDPI journal article supplement (doi:10.3390/ijms23137085), 2022-06-25
Supplement: s1 [file s1]

Supplementary Materials:

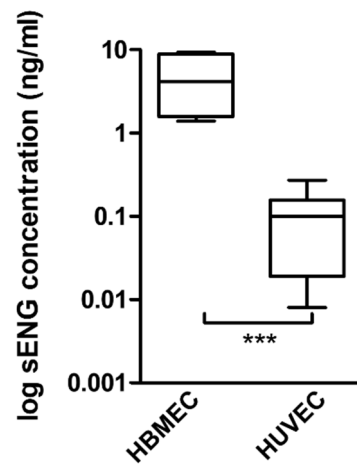

**Figure S1.** Comparative soluble endoglin concentrations in supernatants of human brain microvascular endothelial cells (left) and human umbilical vein endothelial cells (right). Note that the y-axis is on log scale.

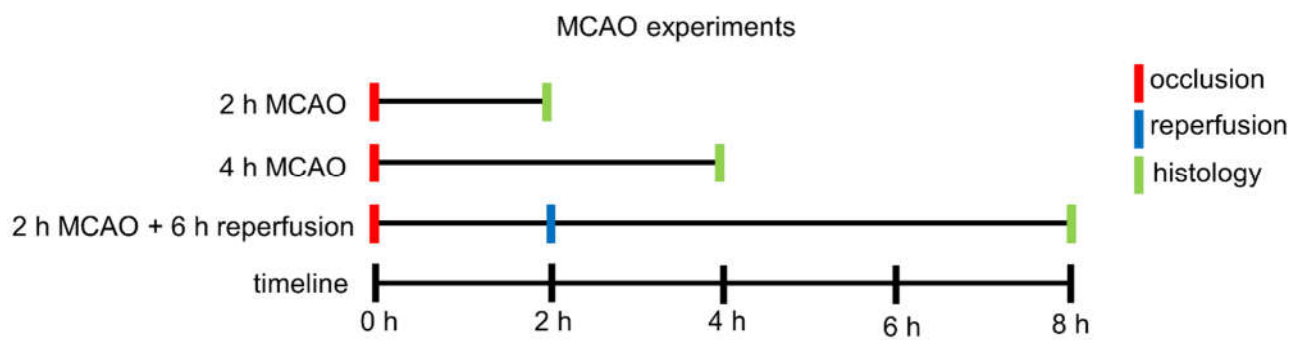

**Figure S2.** Timeline of the animal experiments.
